# Supplementary material
Source: publisher figshare collection journal article supplement (https://acs.figshare.com/ndownloader/files/23708650)
Supplement: Supplementary file 1 [file 23708650]

## **Supporting Information**

### **Placental Trophoblast-Inspired Lipid Bilayers for Cell-Free Investigation of Molecular Interactions**

Christina M. Bailey-Hytholt,<sup>1</sup> Tun-Li Shen,<sup>2</sup> Bonnee Nie,<sup>3</sup> Anubhav Tripathi,<sup>1</sup> Anita Shukla<sup>1\*</sup>

<sup>1</sup>*School of Engineering, Center for Biomedical Engineering, Brown University, Providence, RI 02912*

<sup>2</sup>*Department of Chemistry, Brown University, Providence, RI 02912*

<sup>3</sup>*Department of Biochemistry and Molecular Biology, Brown University, Providence, RI 02912*

\*Corresponding author: anita\_shukla@brown.edu

## **Contents**

**Figure S1:** Lipid compositions with complete fatty acid distributions.

**Figure S2:** Representative dynamic light scattering correlation curves.

**Figure S3:** Confirmation of AH peptide removal after supported placental lipid bilayer formation.

**Figure S4:** Amphotericin B interactions with 1<sup>st</sup> trimester, 3<sup>rd</sup> trimester, and full-term supported placental lipid bilayers.

**Figure S5:** AmBisome interactions with 1<sup>st</sup> trimester, 3<sup>rd</sup> trimester, and full-term supported placental lipid bilayers.

**Figure S6:** Examining transport across 1<sup>st</sup> trimester and 3<sup>rd</sup> trimester suspended placental lipid bilayers and corresponding cell monolayers.

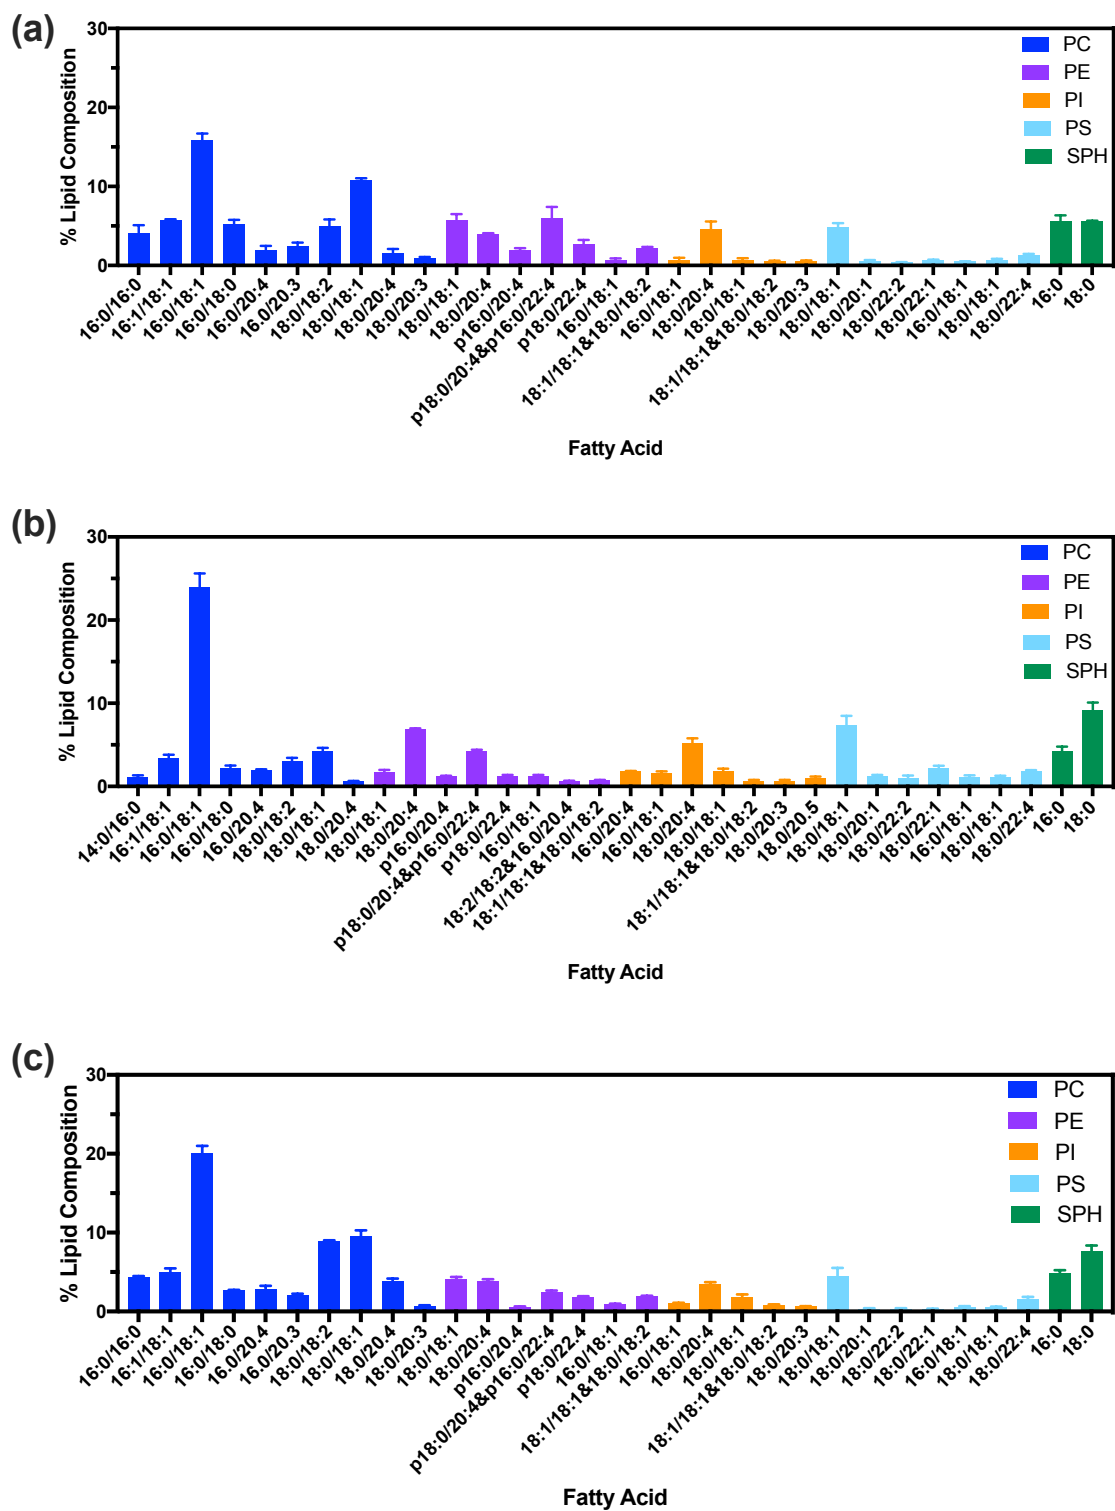

**Figure S1.** Lipid composition with all fatty acid distributions for (a) HTR-8, (b) TCL-1, and (c) primary trophoblast cells. Results are shown as mean  $\pm$  standard deviation; n=3.

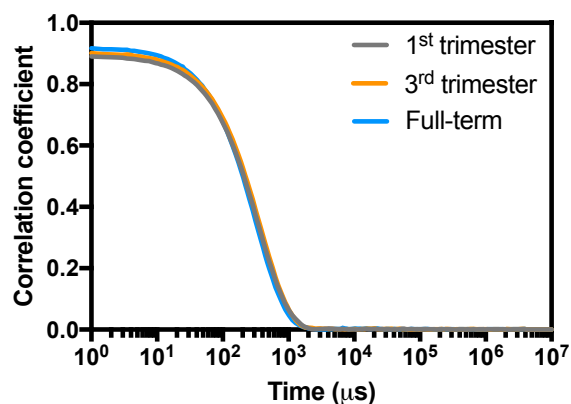

**Figure S2.** Representative dynamic light scattering correlation curves for 1<sup>st</sup> trimester, 3<sup>rd</sup> trimester, and full-term lipid vesicles.

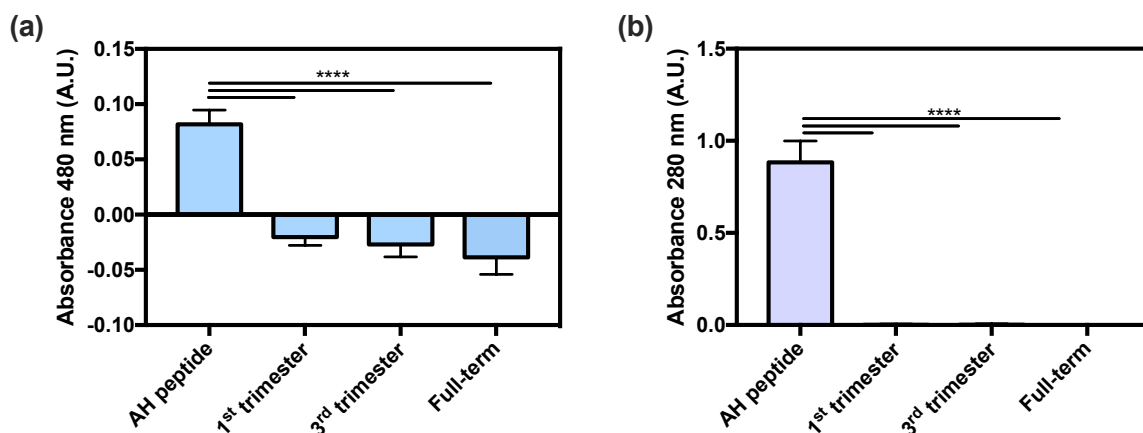

**Figure S3.** Confirmation of AH peptide removal after rupture of supported placental lipid bilayers.

(a) Absorbance measurements for AH peptide using a pierce quantitative colorimetric peptide assay. The control AH peptide concentration was 13  $\mu\text{M}$ , which is the experimental concentration. After bilayer formation, values were below the detection limit (1  $\mu\text{M}$ ). (b) Absorbance measurements after 1<sup>st</sup> trimester, 3<sup>rd</sup> trimester, and full-term bilayer formation, when QCM-D silica coated quartz crystals were rinsed with 2% (w/v) SDS to remove the adsorbed layer. The control

AH peptide concentration was 13  $\mu\text{M}$ , which is the concentration used in bilayer rupture. After bilayer formation, absorbance values were below the detection limit (0.3  $\mu\text{M}$ ). Statistical analysis was performed using one-way ANOVA with Tukey's post hoc analysis;  $n=4$ ;  $\alpha=0.05$ ; \*\*\*\* $p<0.0001$ .

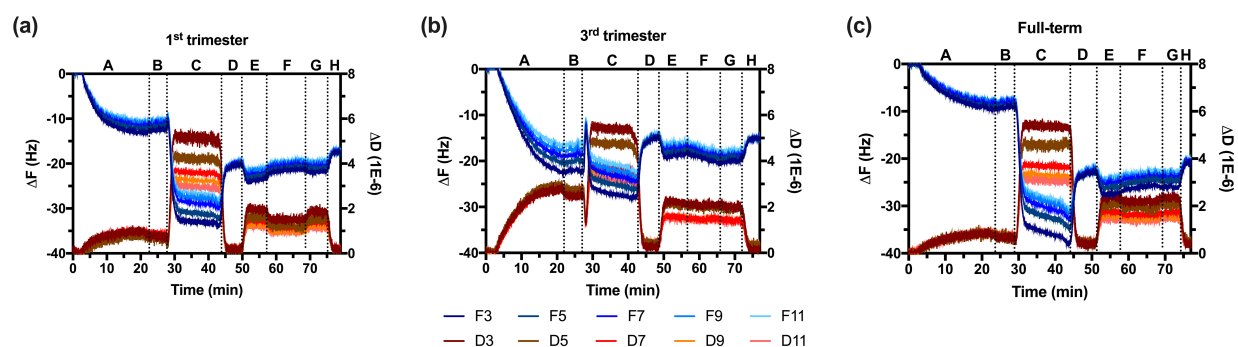

**Figure S4.** Amphotericin B interactions with (a) 1<sup>st</sup> trimester, (b) 3<sup>rd</sup> trimester, and (c) full-term supported placental lipid bilayers investigated via QCM-D. Frequency changes ( $\Delta F$ ) and dissipation changes ( $\Delta D$ ) are shown in blue and red, respectively for overtones 3, 5, 7, 9, and 11. Solution changes are indicated by letters indicating for A: Vesicles, B: Tris NaCl, C: AH peptide, D: Tris NaCl, E: 1% (v/v) DMSO, F: amphotericin B, G: 1% (v/v) DMSO, H: Tris NaCl. Representative QCM-D traces are shown for  $n \geq 3$ .

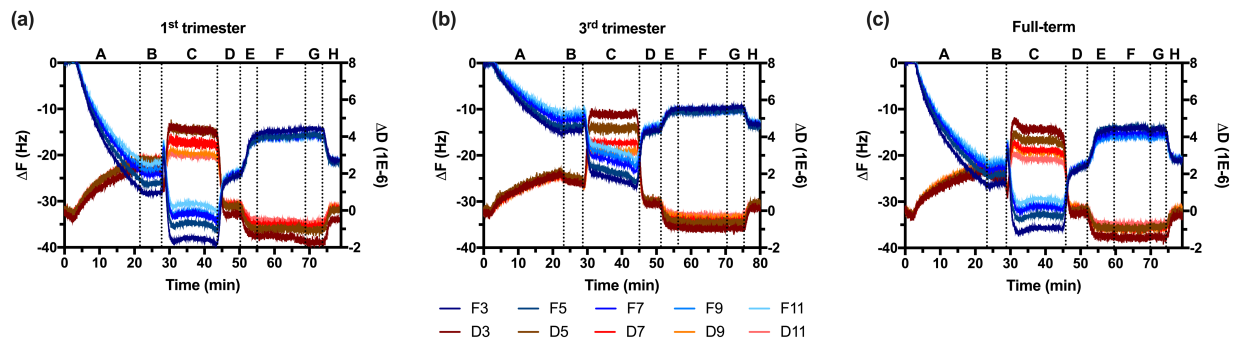

**Figure S5.** AmBisome interactions with (a) 1<sup>st</sup> trimester, (b) 3<sup>rd</sup> trimester, and (c) full-term supported placental lipid bilayers investigated via QCM-D. Frequency changes ( $\Delta F$ ) and dissipation changes ( $\Delta D$ ) are shown in blue and red, respectively for overtones 3, 5, 7, 9, and 11. Solution changes are indicated by letters indicating for A: 1<sup>st</sup> trimester vesicles, B: Tris NaCl, C: AH peptide, D: Tris NaCl, E: 67.8% (w/w) sucrose and 2% (w/w) succinic acid buffer, which is the clinically utilized suspension buffer, F: AmBisome in the suspension buffer, G: 67.8% (w/w) sucrose and 2% (w/w) succinic acid buffer, H: Tris NaCl. Representative QCM-D traces are shown for  $n \geq 3$ .

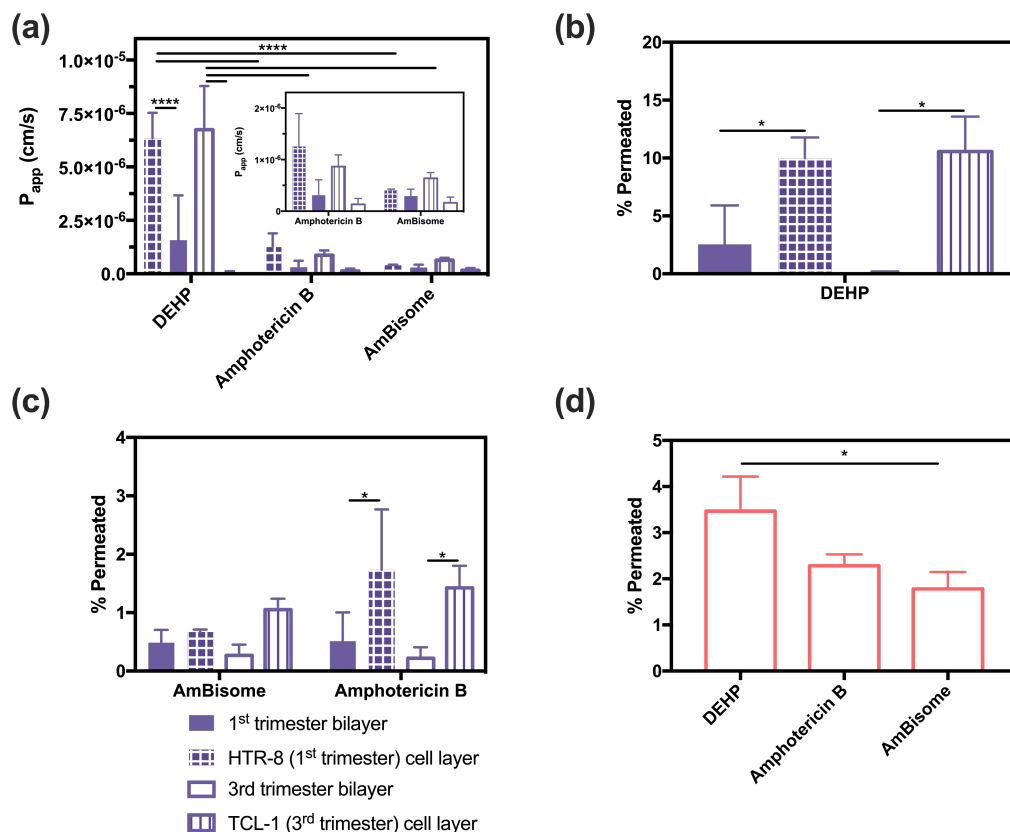

**Figure S6.** Examining transport across 1<sup>st</sup> and 3<sup>rd</sup> trimester suspended placental lipid bilayers and corresponding cell monolayers (HTR-8 and TCL-1, respectively). (a) Apparent permeability ( $P_{app}$ ) of DEHP, amphotericin B, and AmBisome for placental lipid bilayer and cell monolayers. (b) Percent of 200  $\mu$ M DEHP that transports across the placental lipid bilayer after 2 h at 25°C or cell monolayer after 2 h at 37 °C. (c) Percent of AmBisome and amphotericin B that transports across the placental lipid bilayer after 2 h at 25°C or cell monolayer after 2 h at 37 °C. (d) Percent of DEHP, amphotericin B, and AmBisome that transports across a placental collagen coated transwell plate. Statistical analysis was performed using one- or two-way ANOVA with Tukey's post hoc analysis;  $n \geq 3$ ;  $\alpha = 0.05$ ; \* $p < 0.05$ ; \*\*\*\* $p < 0.0001$ .
